# ▶ PODCASTS from APA Publishing

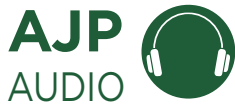

## AJP Audio

Host: Michael D. Roy, Executive Editor, *The American Journal of Psychiatry*

Each episode features an in-depth interview with an author from the most discussed article appearing in the latest issue of *The American Journal of Psychiatry*.

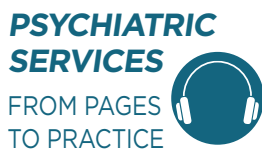

## Psychiatric Services From Pages to Practice

Hosts: Lisa Dixon, M.D., M.P.H., Editor, *Psychiatric Services*, and Josh Berezin, M.D., M.S.

Learn about the latest mental health services research published in *Psychiatric Services* and why it is relevant. Topics include community-based treatment programs, collaborative care, evidence-based treatment and service delivery, criminal and social justice, policy analysis, and more.

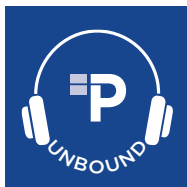

## Psychiatry Unbound

Host: Laura Roberts, M.D., M.A., Editor-in-Chief, APA Publishing Books

APA Publishing's Books podcast offers the opportunity to hear the voices behind the most prominent psychiatric scholarship in the field today. Learn about important topics in the field of psychiatry and see how our authors are making an impact in clinical settings throughout the world.

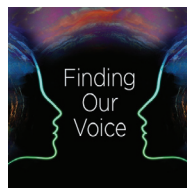

## Finding Our Voice

Host: Sanya Virani, MBBS, MPH

*Finding Our Voice* brings the viewpoints and opinions of the next generation of psychiatrists—including residents, fellows, and early career psychiatrists—to the forefront. Topics covered include systemic racism and social determinants.

Subscribe Today!

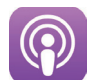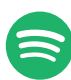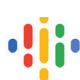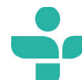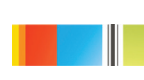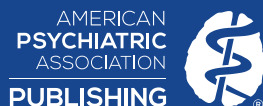

## Enable Psychiatric News Brief

With the American Psychiatric Association's new flash briefing, *Psychiatric News Brief*, you can now listen to synopses of curated articles from *Psychiatric News*. Simply enable this skill and you can listen anytime you choose throughout your day by just saying "Alexa, what's my flash briefing" or "Alexa, tell me what's new".

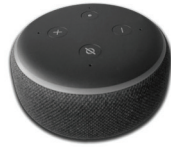

Flash briefing is a customizable Amazon skill that includes updates from your favorite content services. When you say, "Alexa, what's my flash briefing?" or "Alexa, what's the news," you'll hear updates from any organization that you have enabled.

Go to [psychnews.psychiatryonline.org/alexa](http://psychnews.psychiatryonline.org/alexa) to sign up now!

AMERICAN  
PSYCHIATRIC  
ASSOCIATION  
PUBLISHING

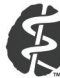

www.appi.org  
Email: [appi@psych.org](mailto:appi@psych.org)  
Phone: 1-800-368-5777

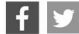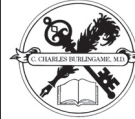

## Call for Nominations

The Institute of Living/Hartford Hospital is pleased to announce that nominations are now being accepted for the 2022 C. Charles Burlingame Award. This award, honoring an outstanding leader in psychiatric education, research or administration, is made in the memory of Dr. Burlingame, psychiatrist-in-chief from 1931 to 1950.

We invite you to nominate a person who has significantly advanced the field of psychiatry. The nomination must include a current curriculum vitae and two letters of support describing the candidate's achievements.

The Institute of Living is a comprehensive behavioral health system for the evaluation and treatment of psychiatric and addiction disorders. We offer a full continuum of services to patients and remain committed to the highest standards of clinical care, research and education.

### Past Recipients

|                                       |                                   |
|---------------------------------------|-----------------------------------|
| 1988 Robert Kellner, M.D., Ph.D.      | 2005 Herbert D. Kleber, M.D.      |
| 1989 William T. Carpenter, Jr., M.D.  | 2006 Daniel N. Stern, M.D.        |
| 1990 Dennis P. Cantwell, M.D.         | 2007 Jerrold F. Rosenbaum, M.D.   |
| 1991 George E. Vaillant, M.D.         | 2008 K. Ranga Rama Krishnan, M.D. |
| 1992 A. John Rush, M.D.               | 2009 David J. Kupfer, M.D.        |
| 1993 John C. Nemiah, M.D.             | 2010 Professor Sir Michael Rutter |
| 1994 Maurice J. Martin, M.D.          | 2011 Jeffrey A. Lieberman, M.D.   |
| 1995 Otto F. Kernberg, M.D.           | 2012 Judith L. Rapoport, M.D.     |
| 1996 Charles P. O'Brien, M.D., Ph.D.  | 2013 Nora D. Volkow, M.D.         |
| 1997 Glen Owen Gabbard, M.D.          | 2014 Daniel R. Weinberger, M.D.   |
| 1998 Lissy F. Jarvik, M.D., Ph.D.     | 2015 David A. Brent, M.D.         |
| 1999 Nancy C. Andreasen, M.D., Ph.D.  | 2016 Steven S. Sharfstein, M.D.   |
| 2000 Lewis L. Judd, M.D.              | 2017 Harold Alan Pincus, M.D.     |
| 2001 Paul S. Appelbaum, M.D.          | 2018 Kenneth S. Kendler, M.D.     |
| 2002 Charles B. Nemeroff, M.D., Ph.D. | 2019 Max Fink, M.D.               |
| 2003 Dilip V. Jeste, M.D.             | 2020 Ned H. Kalin, M.D.           |
| 2004 David H. Barlow, Ph.D.           | 2021 Herbert Y. Meltzer, M.D.     |

**Hartford**  
**HealthCare**  
Institute of Living

Nominations should be sent no later than March 18, 2022 to:  
Javeed Sukhera, MD, PhD  
Chair/Chief of Psychiatry  
Institute of Living/Hartford Hospital  
200 Retreat Ave., Hartford, CT 06106  
or e-mail to [Faye.Jenkins@hhhealth.org](mailto:Faye.Jenkins@hhhealth.org)

## APA Publishing Audio Books Listen anytime, anywhere

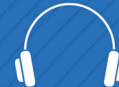

Purchase and listen at [appi.org](http://appi.org)

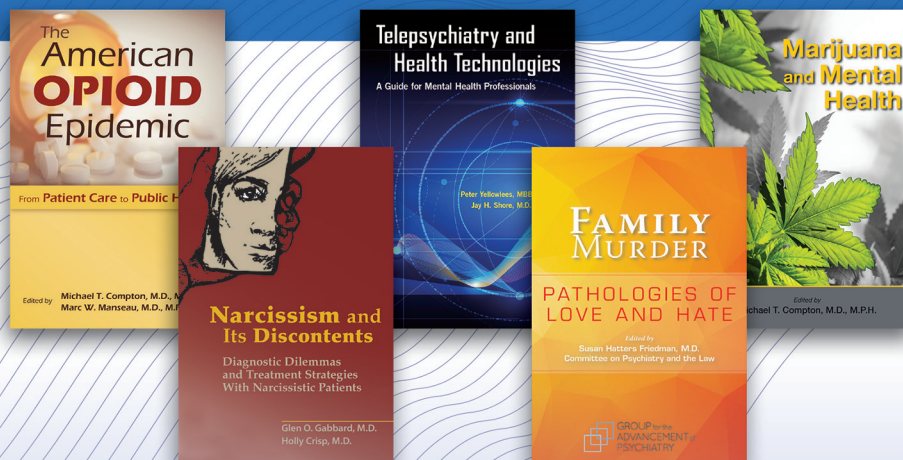

Also available at: Google Podcasts, Apple Podcasts, Spotify, Stitcher, and YouTube

AMERICAN  
PSYCHIATRIC  
ASSOCIATION  
PUBLISHING

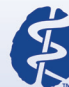

www.appi.org  
Email: [appi@psych.org](mailto:appi@psych.org)  
Toll-Free: 1-800-368-5777

Coming March 2022!

# Diagnostic and Statistical Manual of Mental Disorders, Fifth Edition, Text Revision (DSM-5-TR™)

American Psychiatric Association

The *Diagnostic and Statistical Manual of Mental Disorders*, Fifth Edition, Text Revision (DSM-5-TR), is the most comprehensive, current, and critical resource for clinical practice available to today's mental health clinicians and researchers. DSM-5-TR includes the fully revised text and references, updated diagnostic criteria and ICD-10-CM codes since DSM-5 was published in 2013. It features a new disorder, Prolonged Grief Disorder, as well as codes for suicidal behavior available to all clinicians of any discipline without the requirement of any other diagnosis.

With contributions from over 200 subject matter experts, this updated volume boasts the most current text updates based on the scientific literature. Now in four-color and with the ability to authenticate each printed copy, DSM-5-TR provides a cohesive, updated presentation of criteria, diagnostic codes, and text. This latest volume offers a common language for clinicians involved in the diagnosis and study of mental disorders and facilitates an objective assessment of symptom presentations across a variety of clinical settings—inpatient, outpatient, partial hospital, consultation-liaison, clinical, private practice, and primary care.

2022 • 1,250 pages • ISBN 978-0-89042-575-6 • Hardcover • \$220.00 • Item #2575

2022 • 1,250 pages • ISBN 978-0-89042-576-3 • Paperback • \$170.00 • Item #2576

2022 • 1,250 pages • ISBN 978-0-89042-577-0 • eBook • \$136.00 • Item #2577

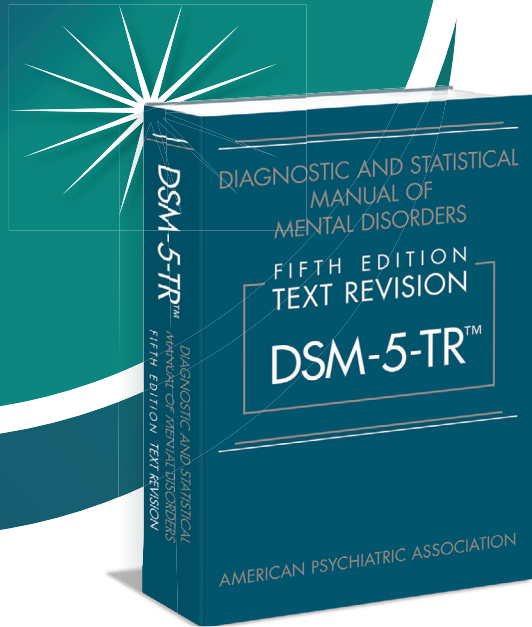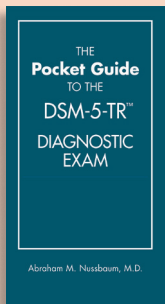

## The Pocket Guide to the DSM-5-TR® Diagnostic Exam

Abraham M. Nussbaum, M.D., M.T.S.

2022 • 295 pages  
ISBN 978-1-61537-357-4  
Paperback • \$75.00 • Item #37357

2022 • 295 pages  
ISBN 978-1-61537-358-1  
eBook • \$60.00 • Item #37358

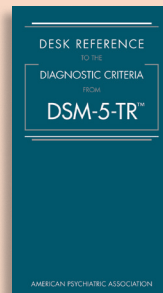

## Desk Reference to the Diagnostic Criteria from DSM-5-TR®

American Psychiatric Association

2022 • 450 pages  
ISBN 978-0-89042-579-4  
Paperback • \$75.00 • Item #2579

2022 • 450 pages  
ISBN 978-0-89042-580-0  
Spiralbound • \$75.00 • Item #2580

2022 • 450 pages  
ISBN 978-0-89042-581-7  
eBook • \$60.00 • Item #2581

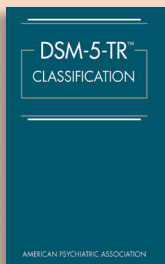

## DSM-5-TR® Classification

American Psychiatric Association

2022 • 150 pages  
ISBN 978-0-89042-583-1  
Spiralbound • \$35.00 • Item #2583

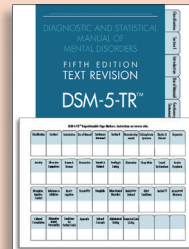

## DSM-5-TR® Repositionable Page Markers

American Psychiatric Association

2022 • 1 page  
ISBN 978-0-89042-582-4  
Repositionable Page Markers  
\$12.50 • Item #2582

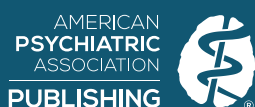

20% Discount for American Psychiatric Association Members

25% Discount for APA Resident-Fellow Members

▶ ORDER @ [www.appi.org](http://www.appi.org) | Email: [appi@psych.org](mailto:appi@psych.org) | Toll Free: 1-800-368-5777
