FEBRUARY 2022 | VOLUME 73 | NUMBER 2

# Psychiatric Services

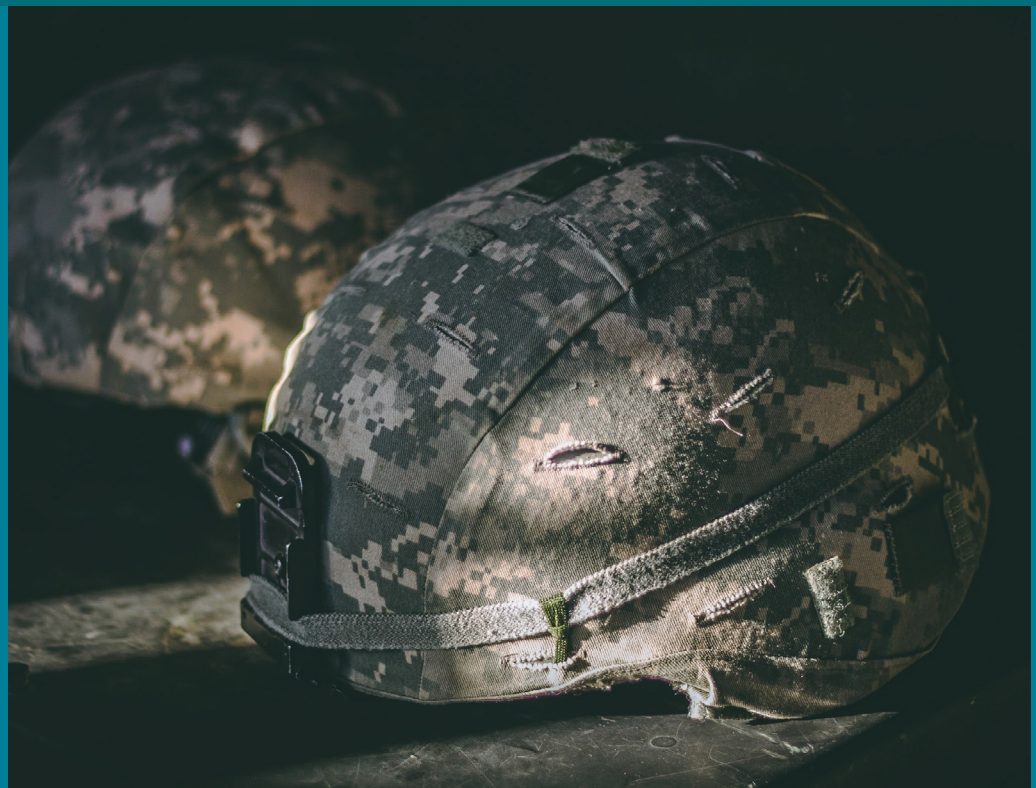

Racial disparities in clinical outcomes of VA residential PTSD treatment  
Veteran journeys: creating an opera from research, clinical, and personal experiences  
Pandemic experiences of persons with serious mental illness  
National practice guidelines for peer support specialists and supervisors

AMERICAN  
**PSYCHIATRIC**  
ASSOCIATION

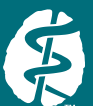

[ps.psychiatryonline.org](https://ps.psychiatryonline.org)

FEBRUARY 2022

VOLUME 73 | NUMBER 2

PSYCHIATRIC SERVICES
